# Supplementary material for: Use of δ13C and δ15N as Indicators to Evaluate the Influence of Sewage on Organic Matter in the Zhangjiang Mangrove–Estuary Ecosystem, Southeastern China
Source: MDPI journal article supplement (doi:10.3390/w15203660), 2023-10-19
Supplement: s1 [file s1]

Table S1. The  $\delta^{13}\text{C}$ ,  $\delta^{15}\text{N}$  of mangrove plants in Yunxiao mangroves.

| Station | $\delta^{13}\text{C}$ (‰) | $\delta^{15}\text{N}$ (‰) |
|---------|---------------------------|---------------------------|
| A2      | 11.48                     | -31.45                    |
| A5      | 9.63                      | -30.69                    |

Table S2: The concentration of dissolved organic carbon in Zhangjiang estuary.

| Station | Dissolved organic carbon ( $\text{mmol L}^{-1}$ ) |
|---------|---------------------------------------------------|
| S1      | 0.206                                             |
| S2      | 0.186                                             |
| S3      | 0.311                                             |
| S4      | 0.311                                             |
| S5      | 0.215                                             |
| S6      | 0.204                                             |
| S7      | 0.185                                             |
